# Supplementary material for: Lymph node and tumor-associated PD-L1+ macrophages antagonize dendritic cell vaccines by suppressing CD8+ T cells
Source: PubMed Central journal article supplement — Cell Rep Med. 2024 Jan 16;5(1):101377. doi: 10.1016/j.xcrm.2023.101377 (PMC10829875; doi:10.1016/j.xcrm.2023.101377), 2024-01-16

# Gating strategy dying/dead CD4<sup>+</sup> and CD8<sup>+</sup> T cells

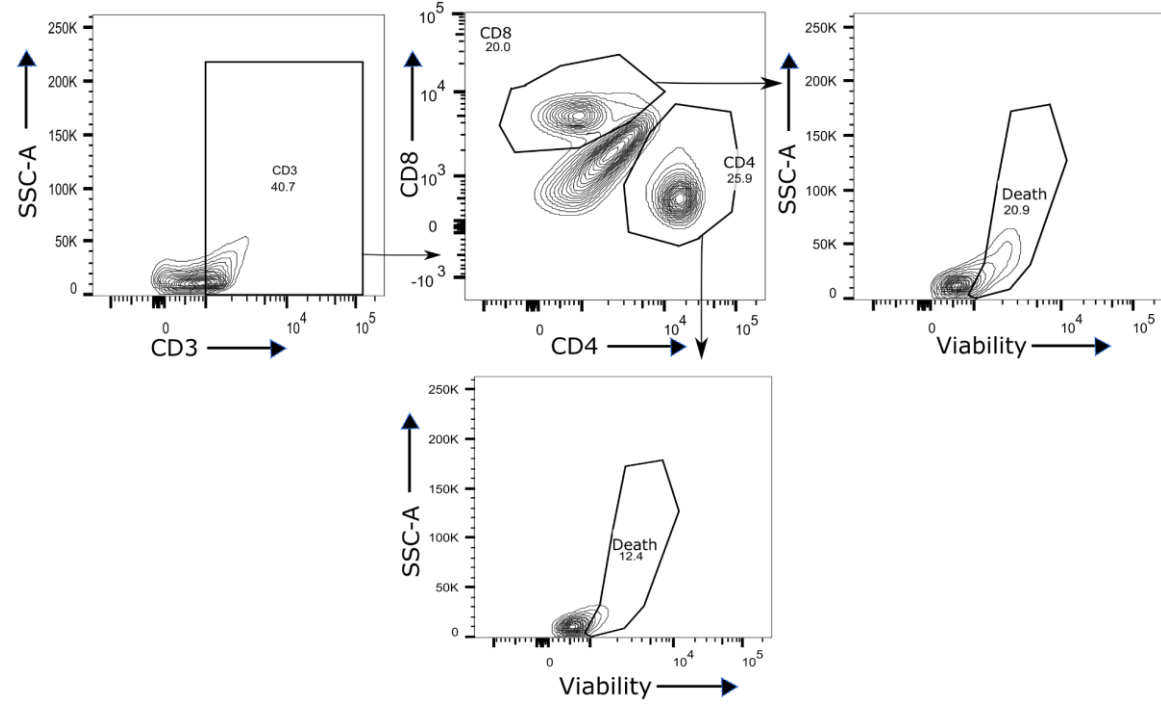

# Gating strategy M1 and M2 macrophages

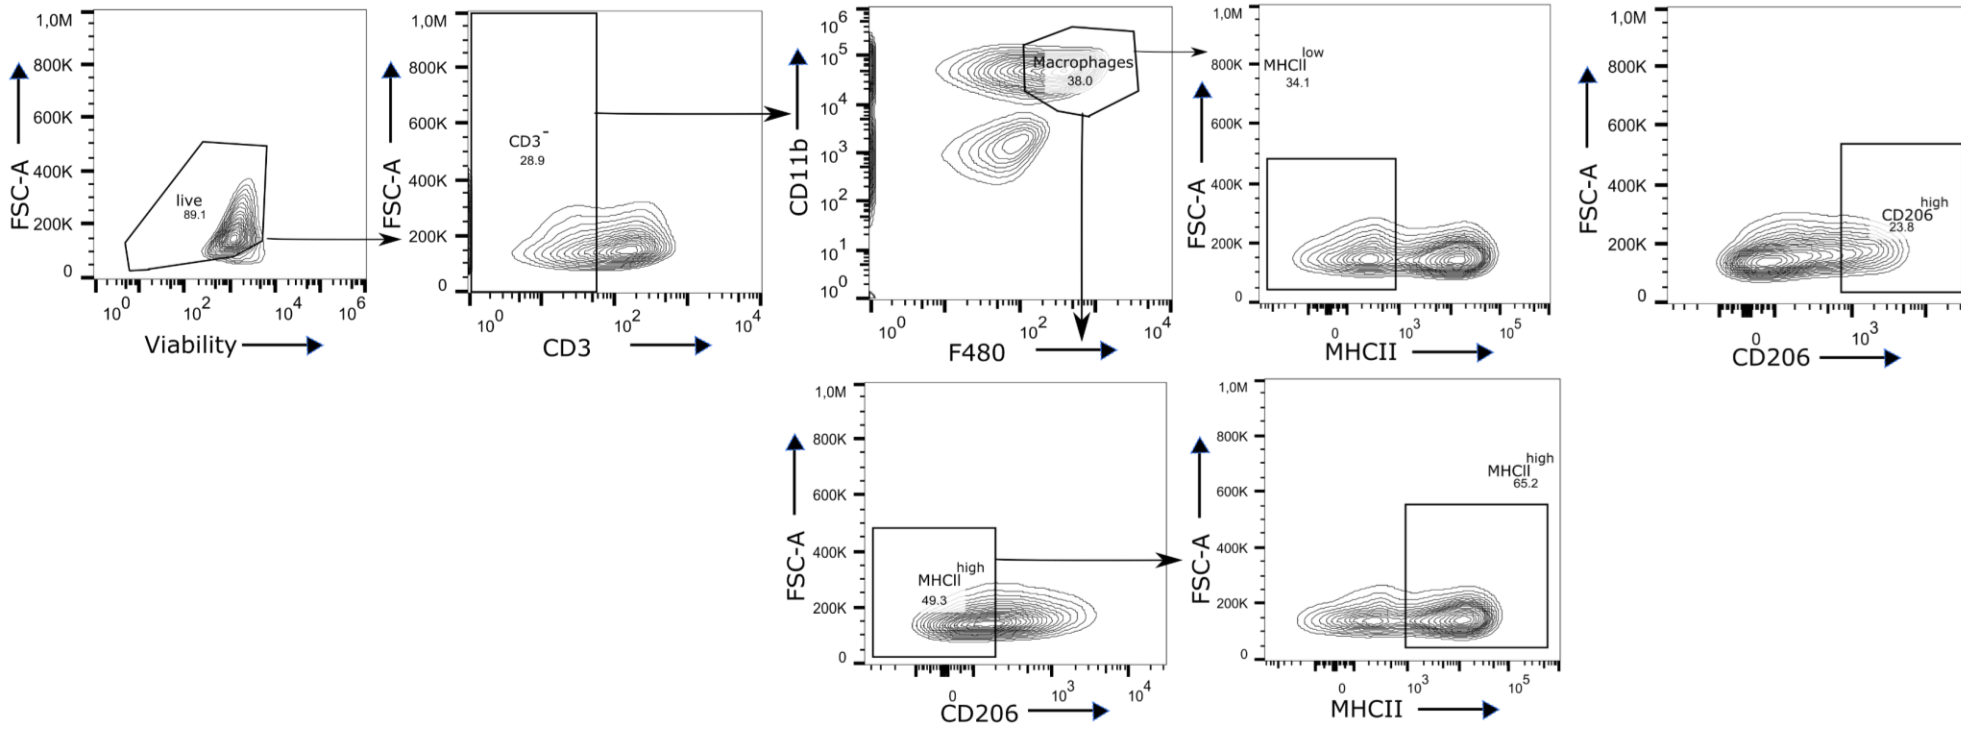

# Gating strategy Fibroblasts, endothelial cells and tumoural cells

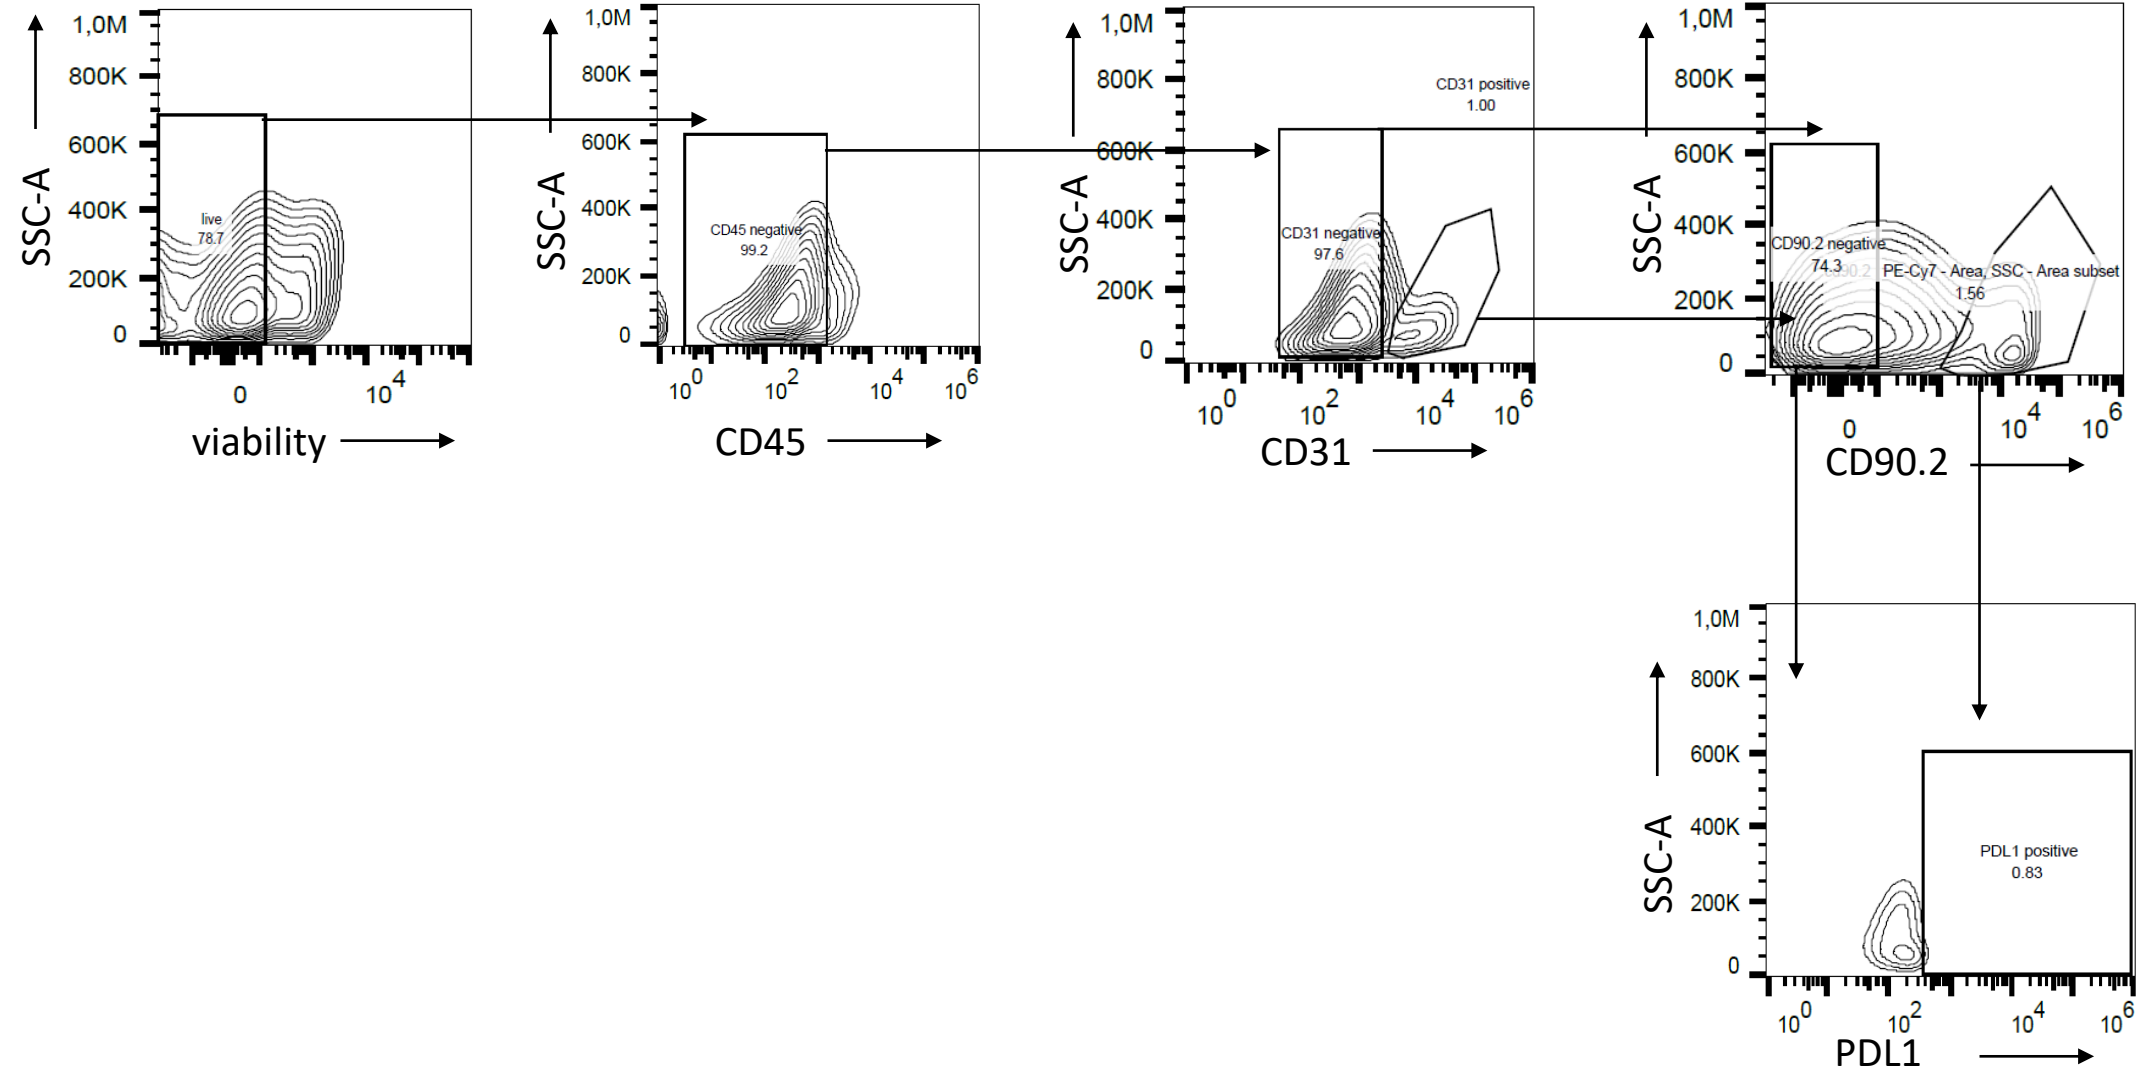

# Gating strategy mature DCs

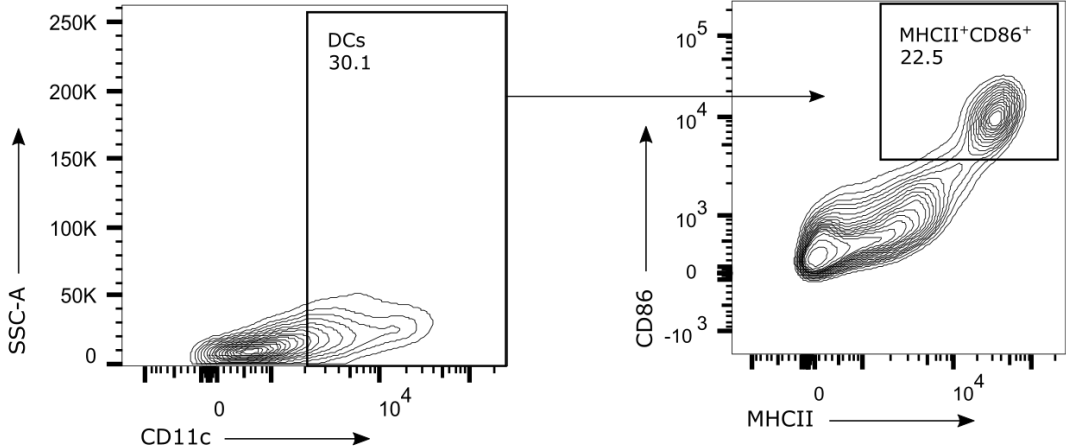

# Gating strategy mregDCs

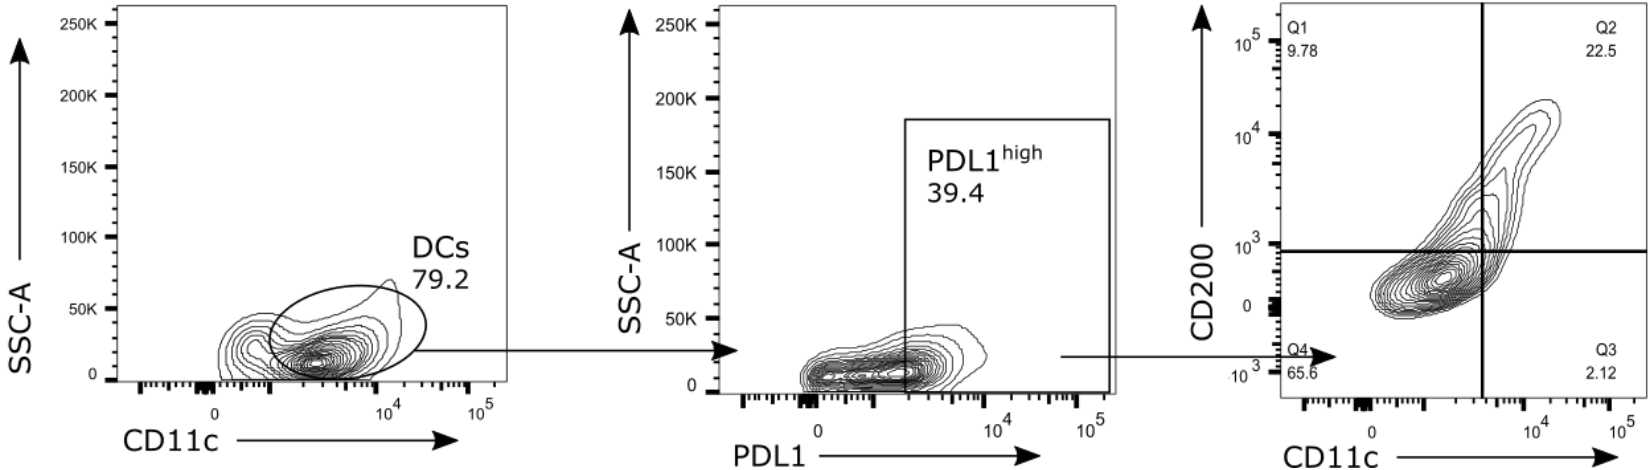

# Gating strategy cDC1 and cDC2

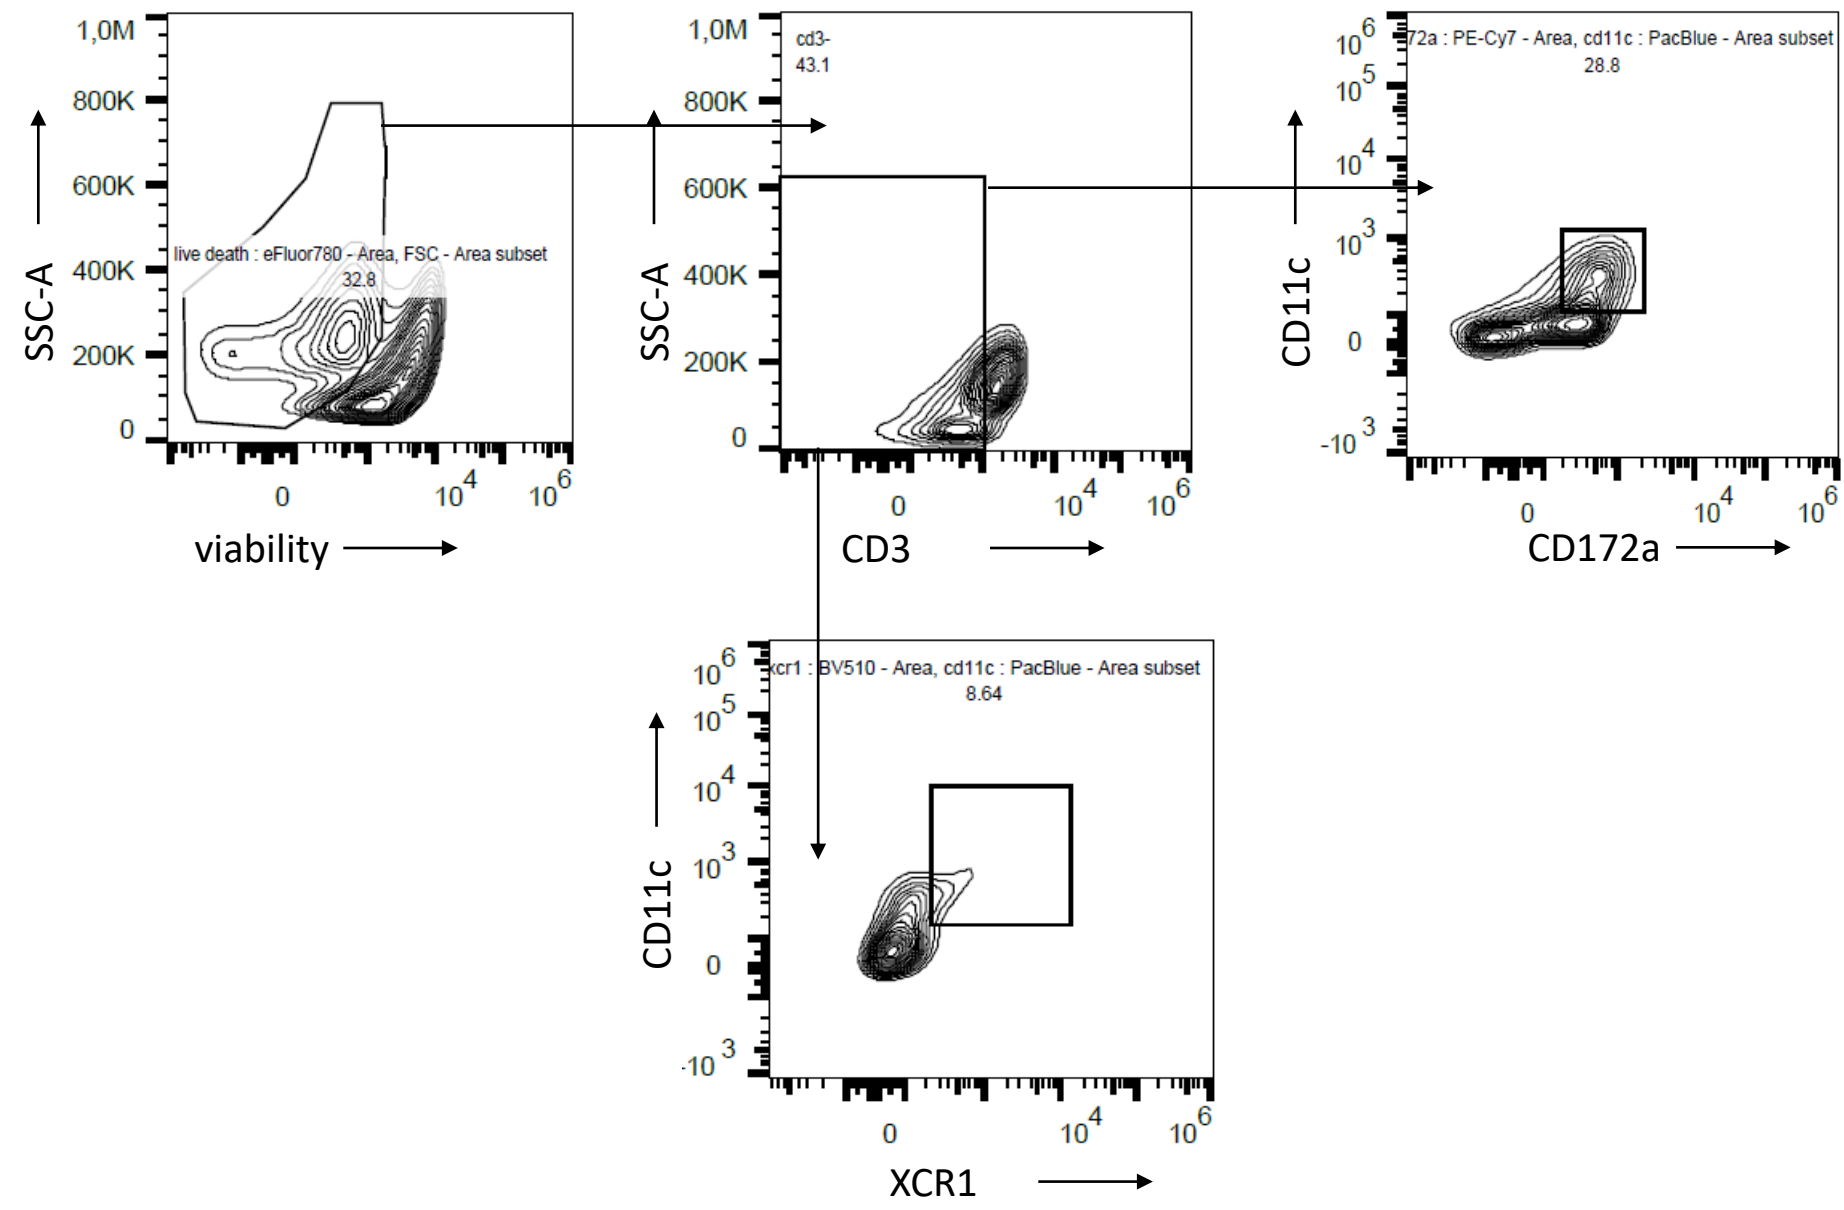

US

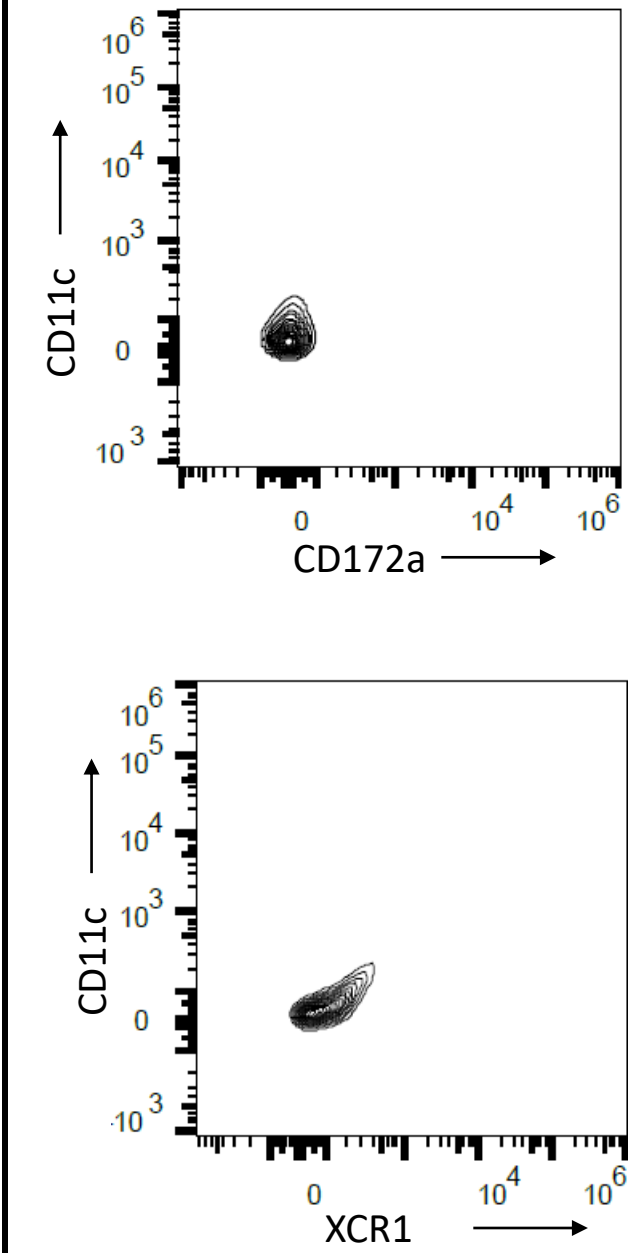

# Gating strategy human T cells

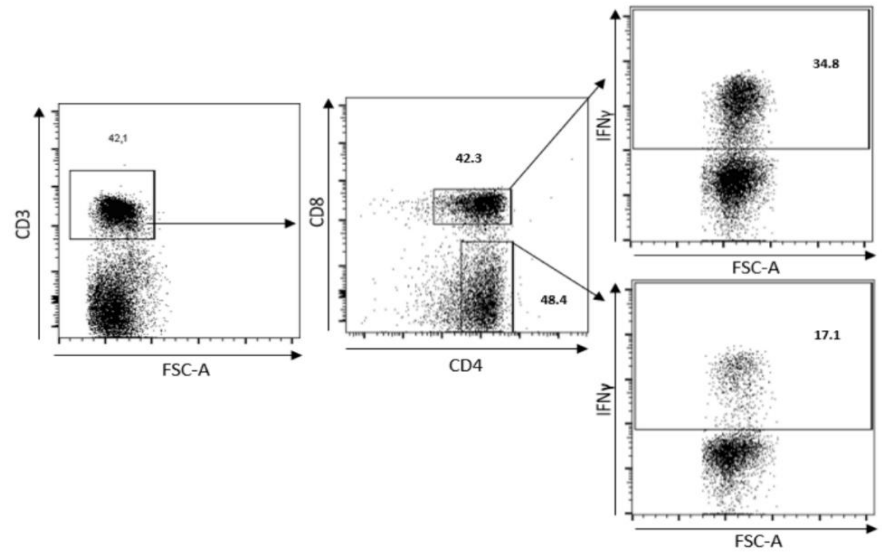

# Gating strategy TNF, TRAIL and FASL TAMs

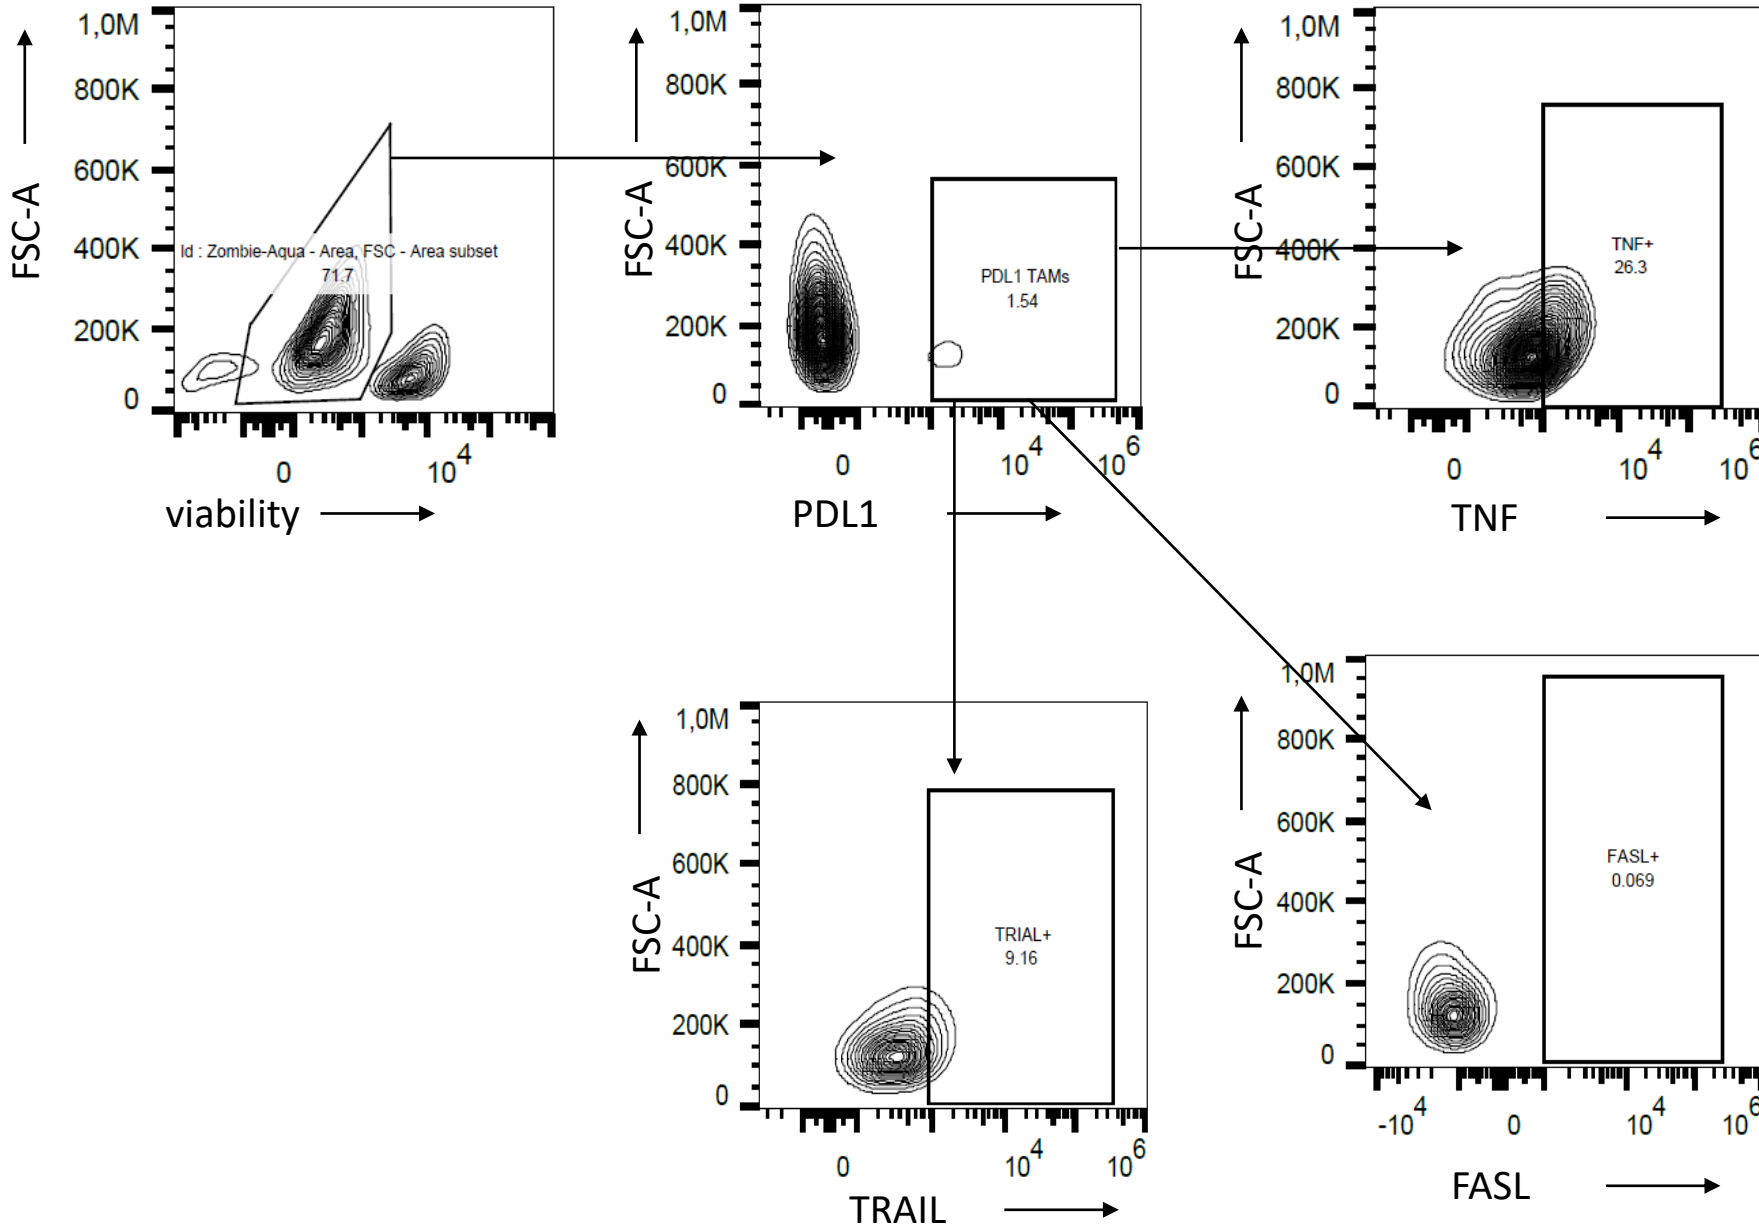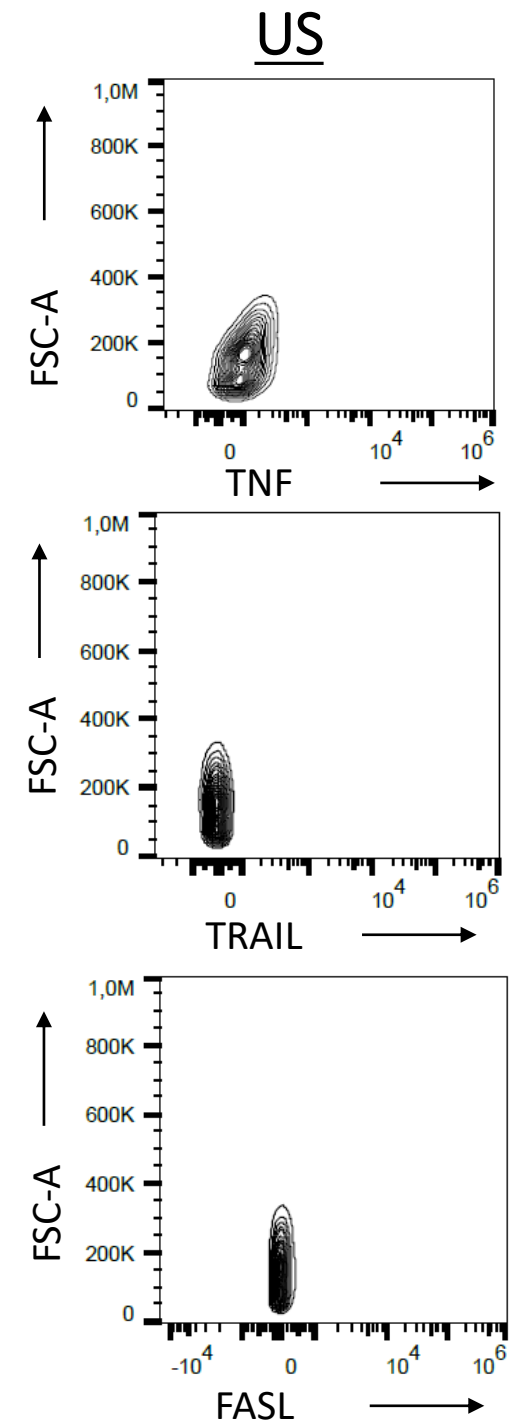

Supplement: mmc2.pdf [file mmc2.pdf]
